# Supplementary material for: A Heritable Antiviral RNAi Response Limits Orsay Virus Infection in Caenorhabditis elegans N2
Source: PubMed Central journal article supplement (PMC3933659; doi:10.1371/journal.pone.0089760), 2014-02-24

# JU1580 L1

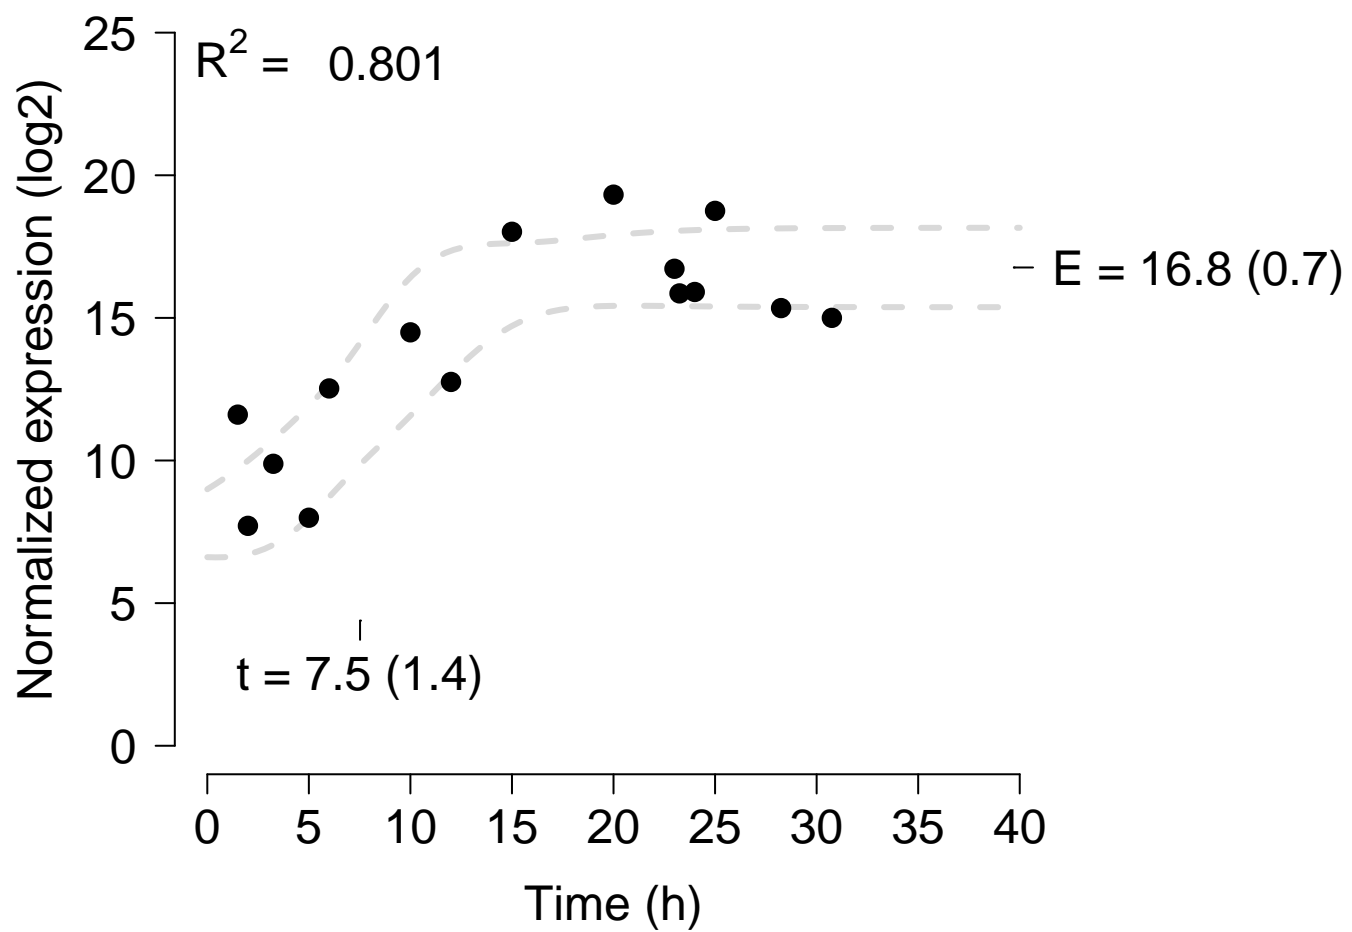

# JU1580 L2

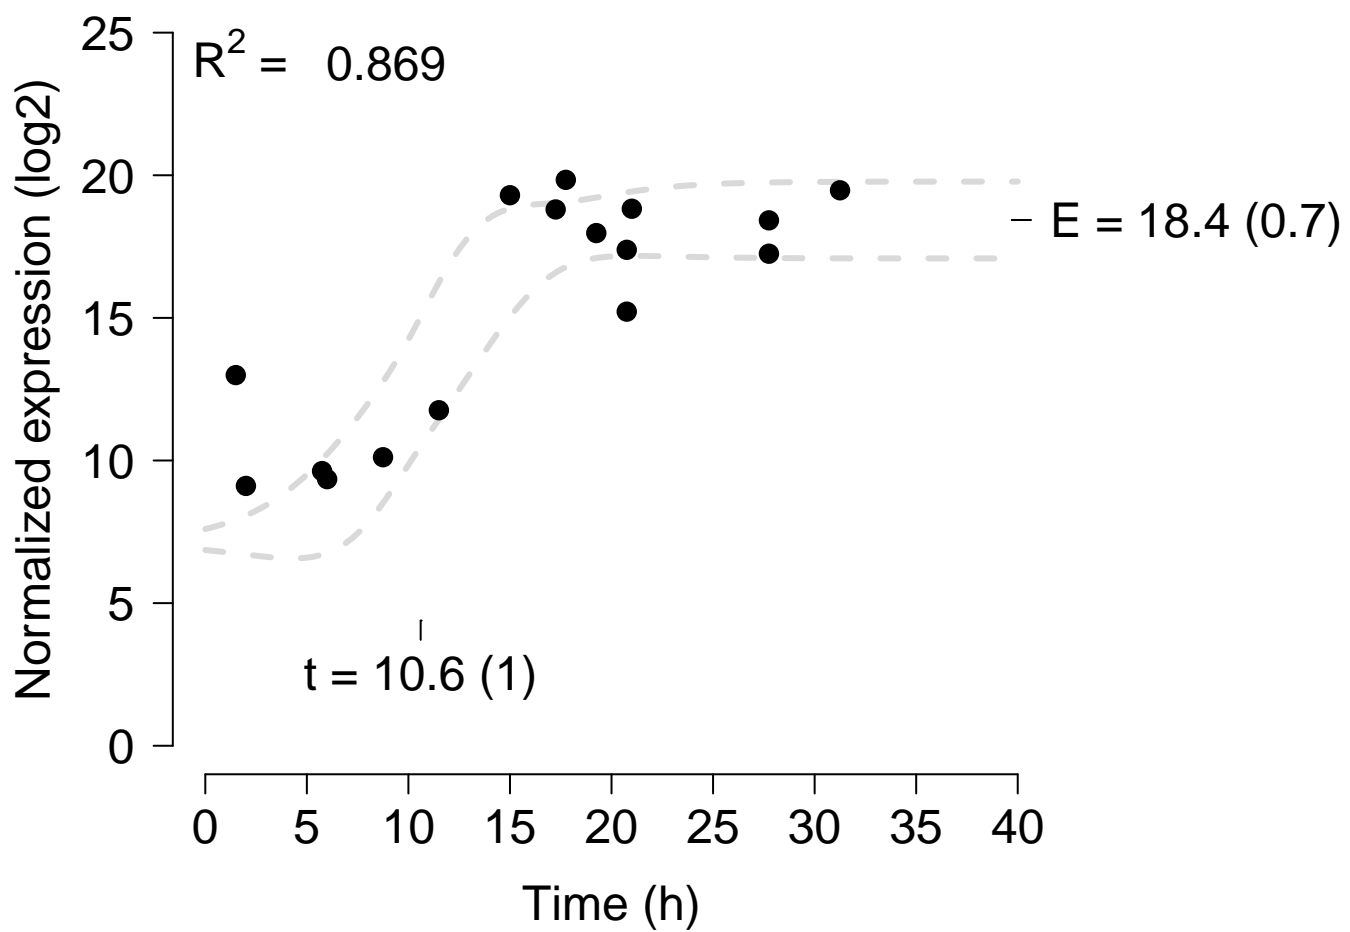

# JU1580 L3

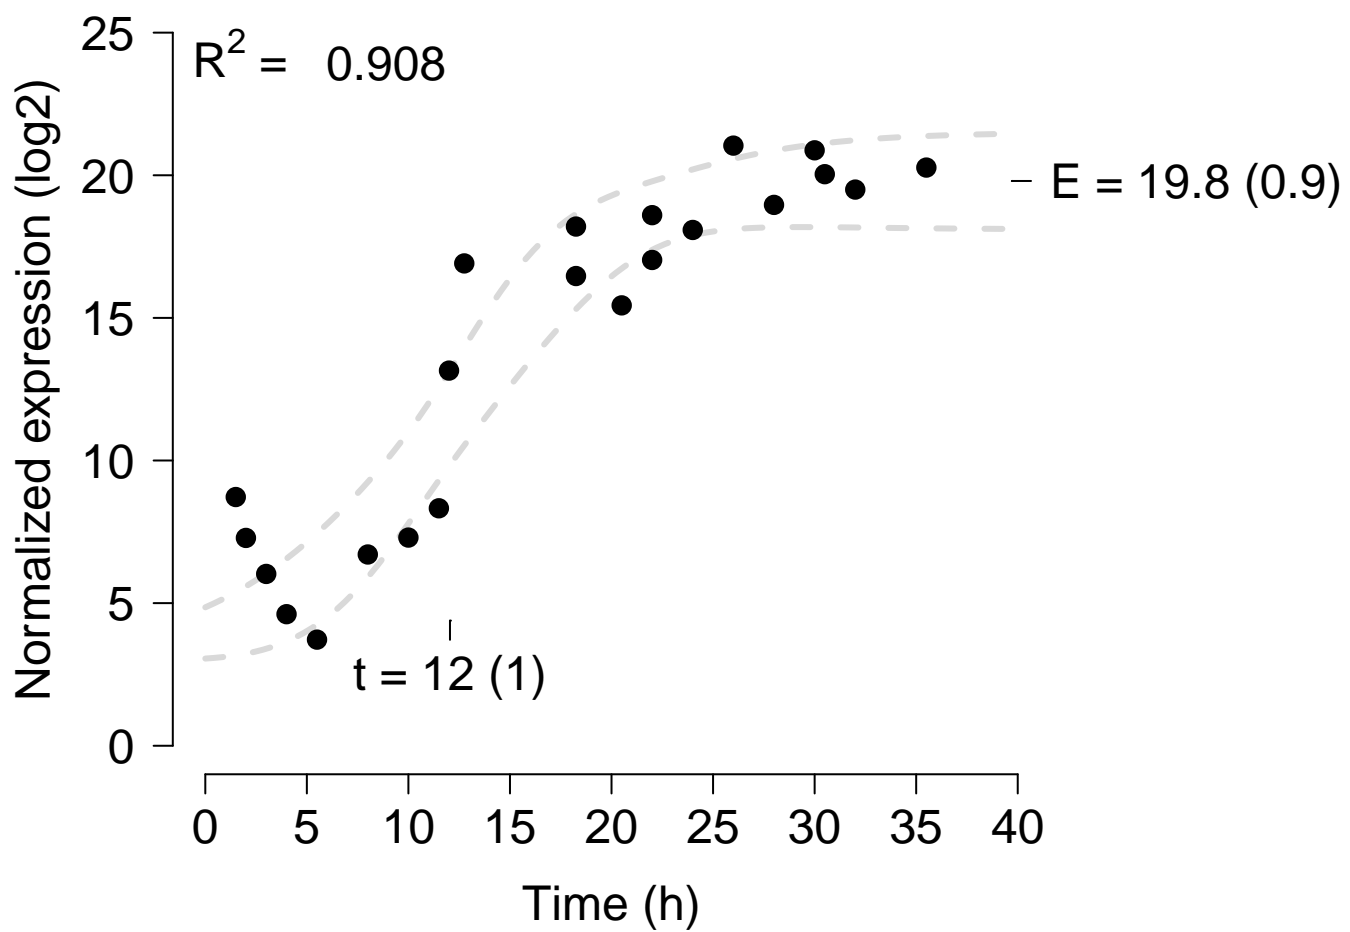

# JU1580 L4

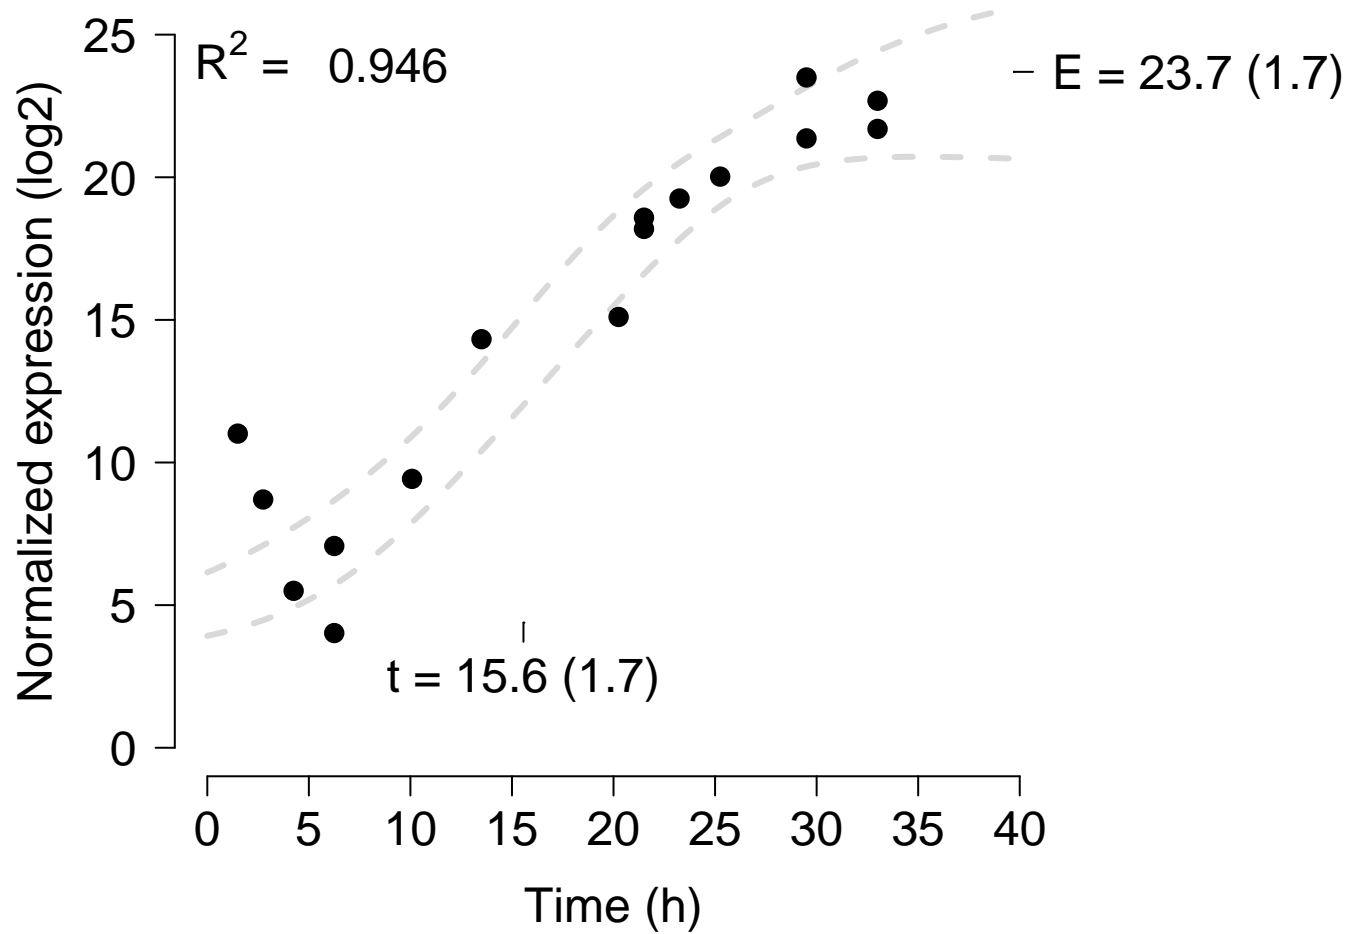

# N2 L1

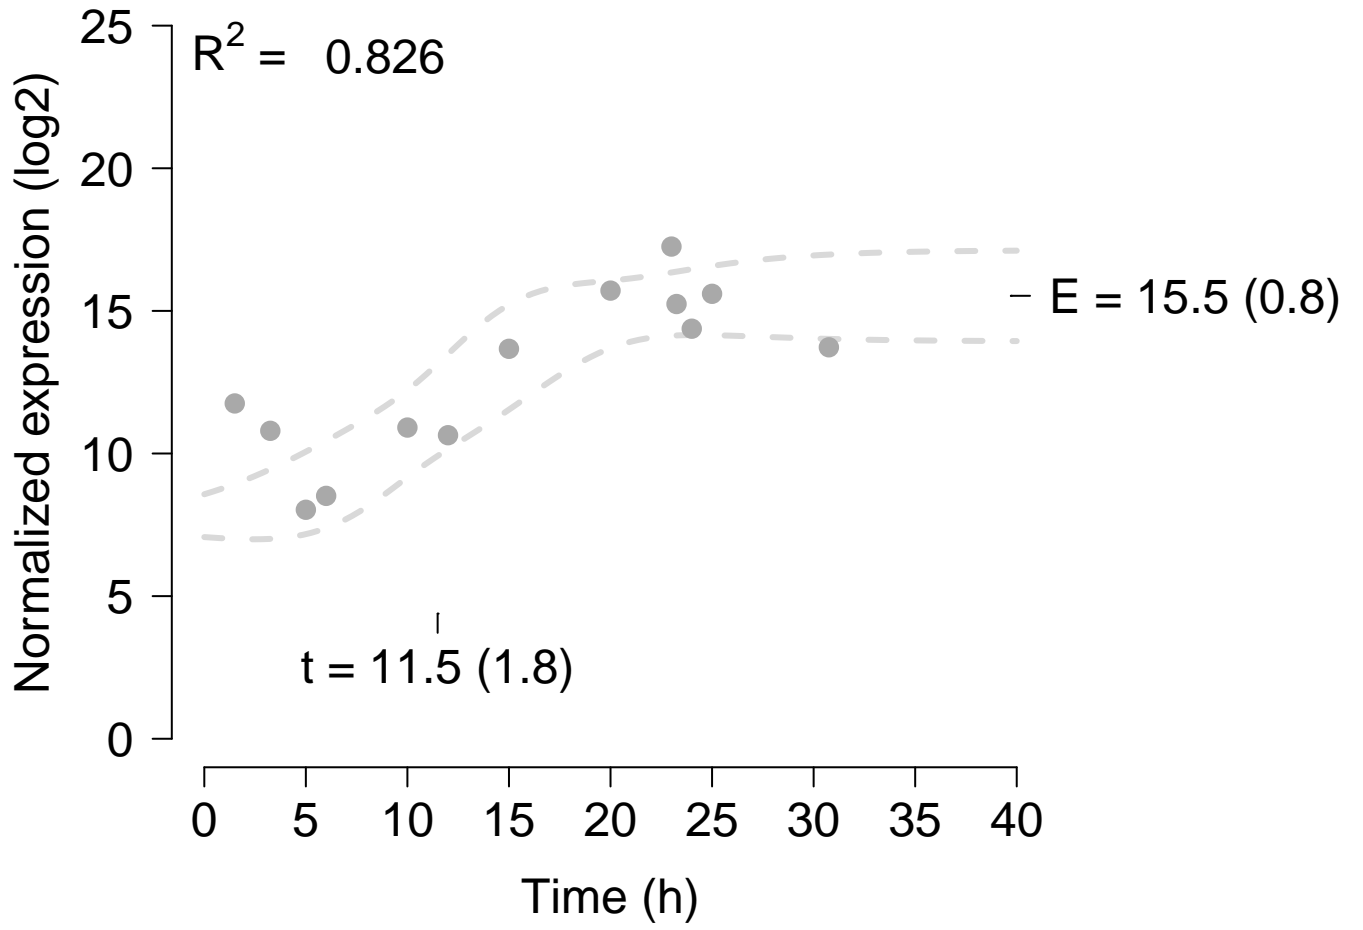

# N2 L2

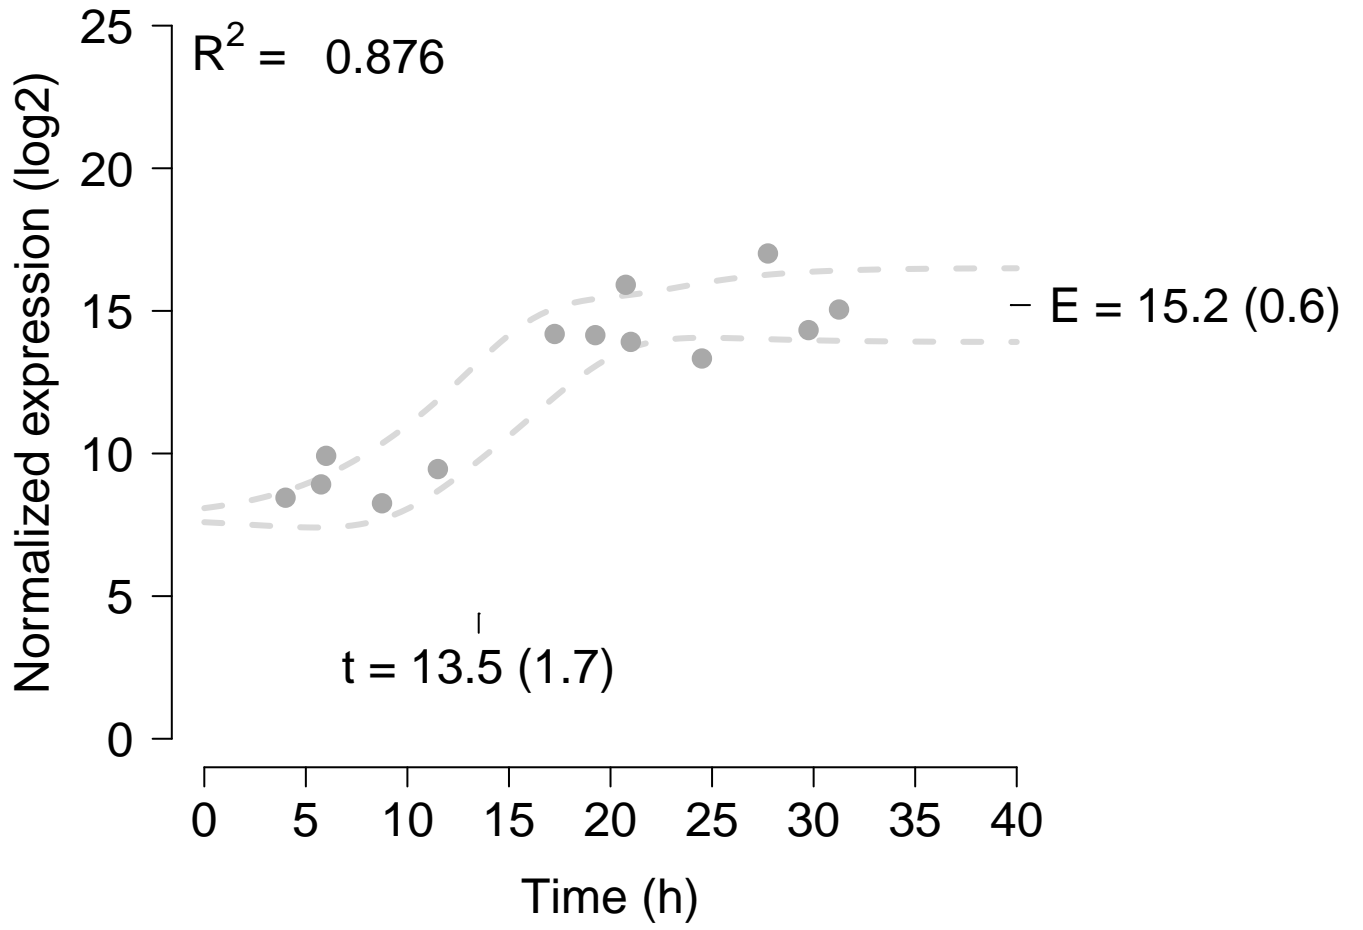

# N2 L3

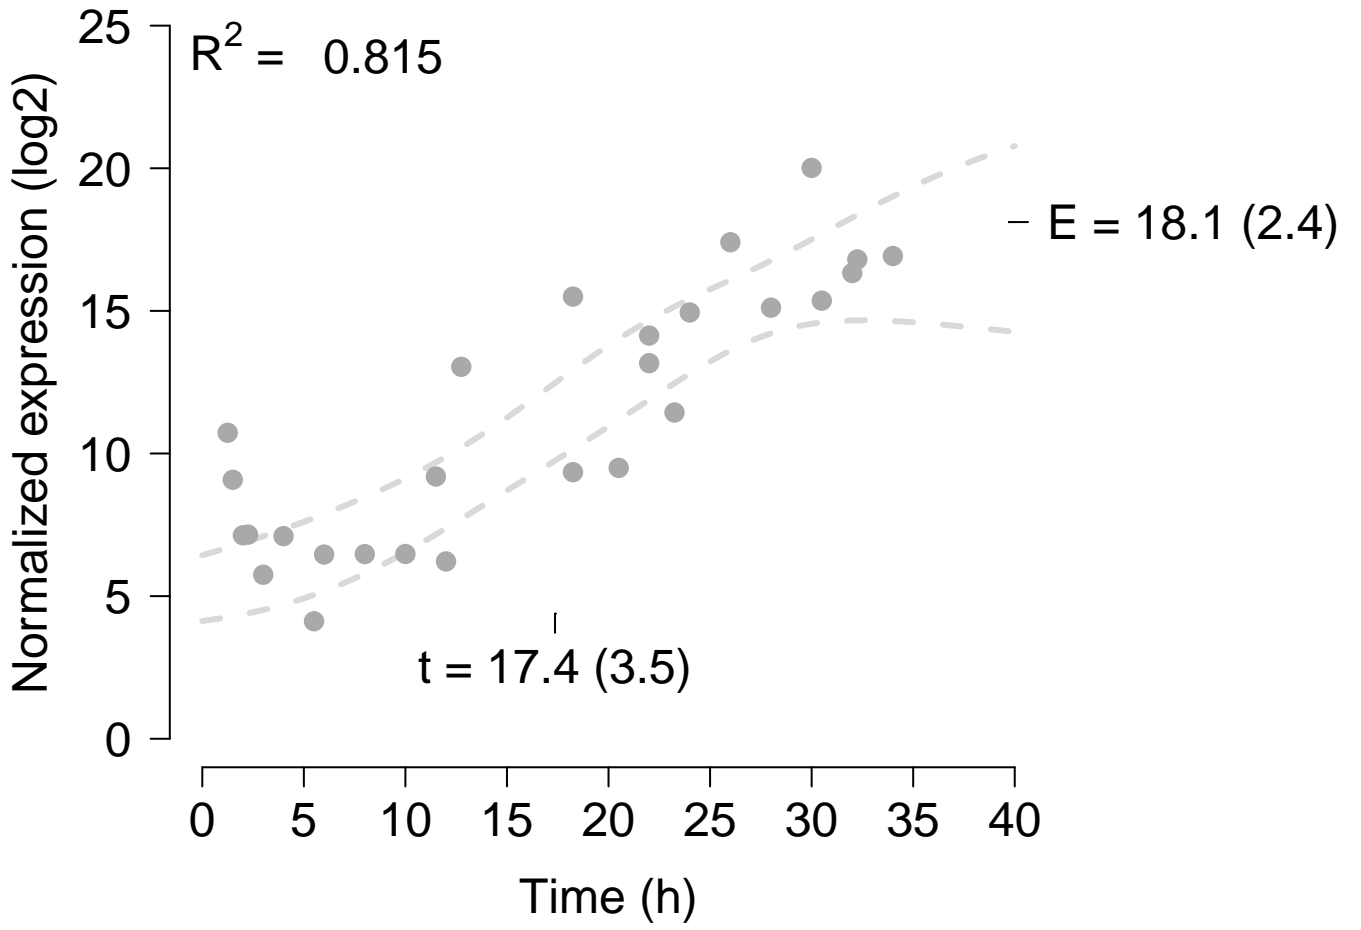

# N2 L4

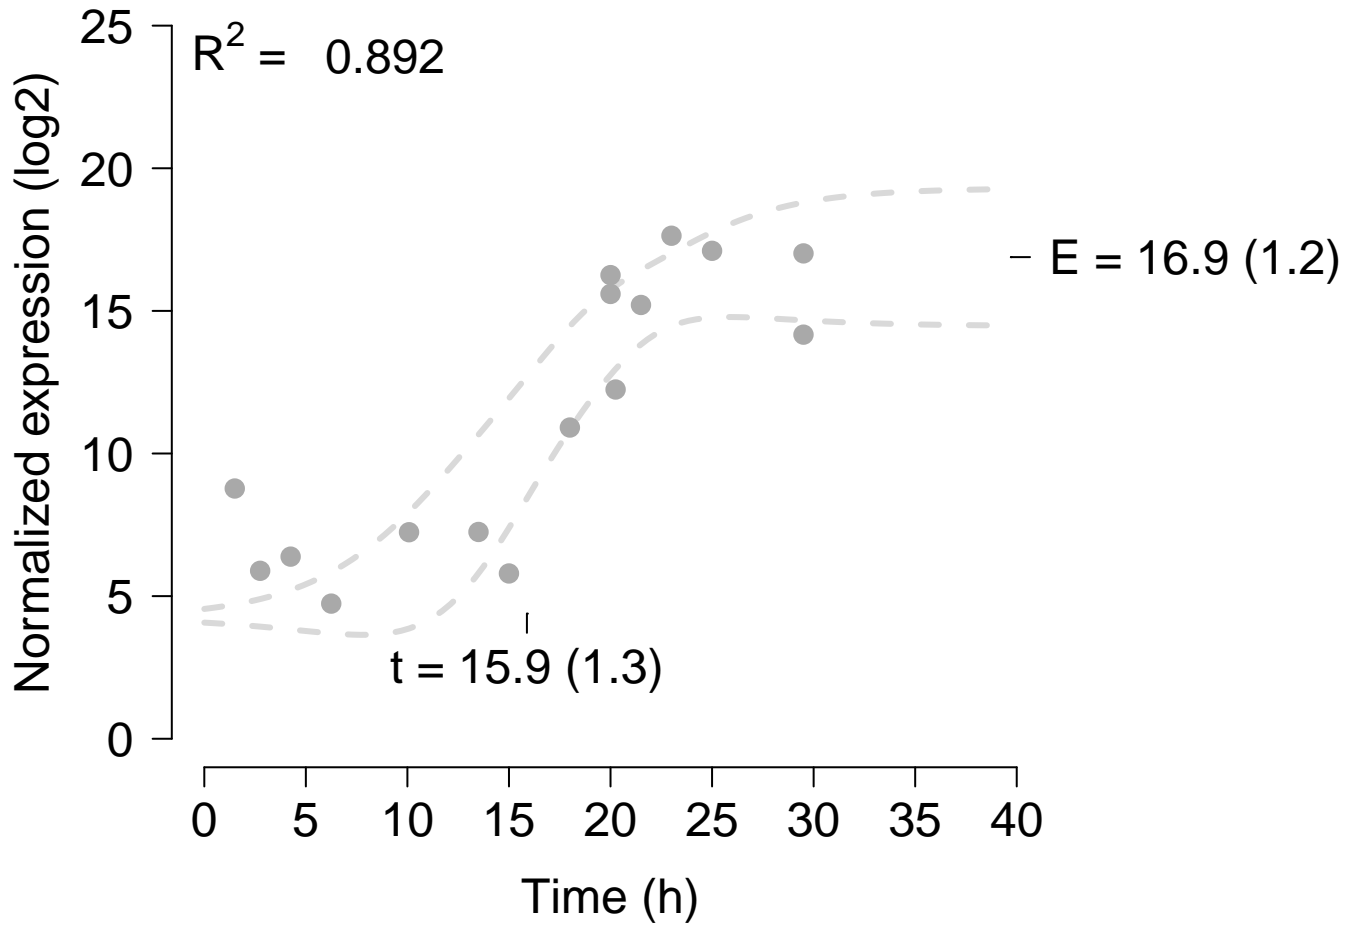



rde-2 L3

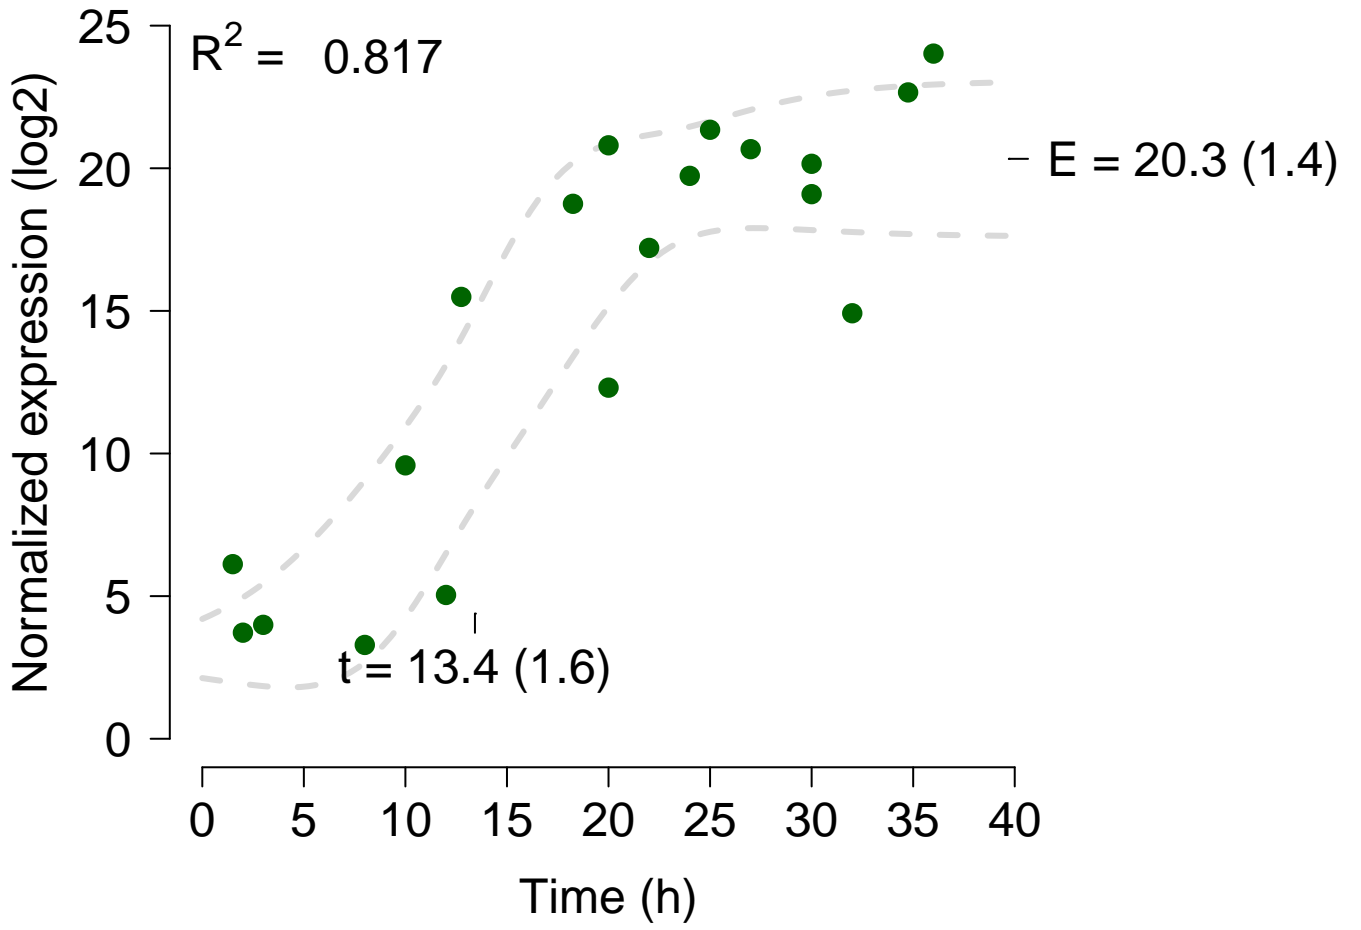

rde-4 L3

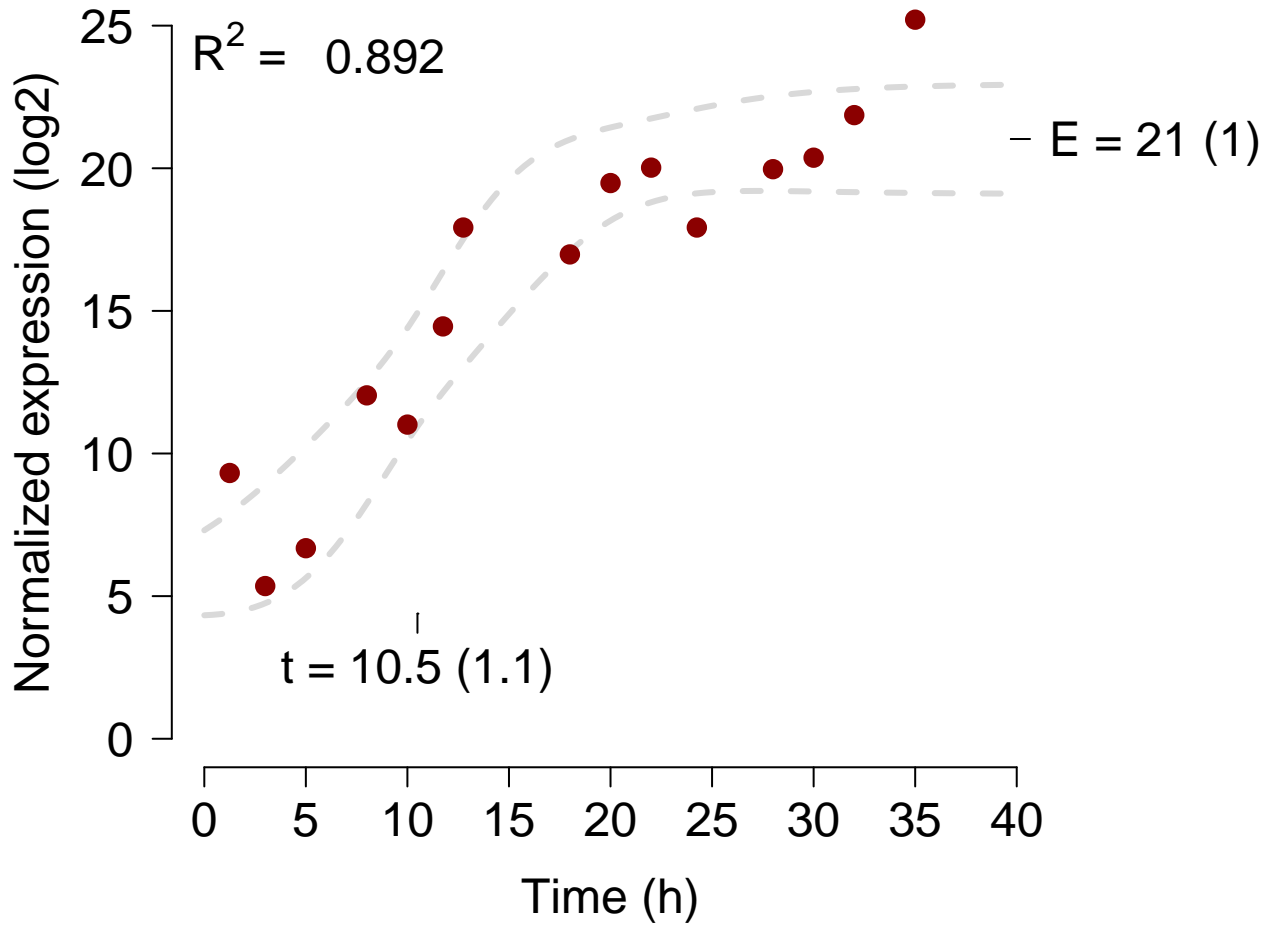

Supplement: pone.0089760.s001.pdf [file pone.0089760.s001.pdf]
