# Supplementary material for: A Heritable Antiviral RNAi Response Limits Orsay Virus Infection in Caenorhabditis elegans N2
Source: PubMed Central journal article supplement (PMC3933659; doi:10.1371/journal.pone.0089760), 2014-02-24

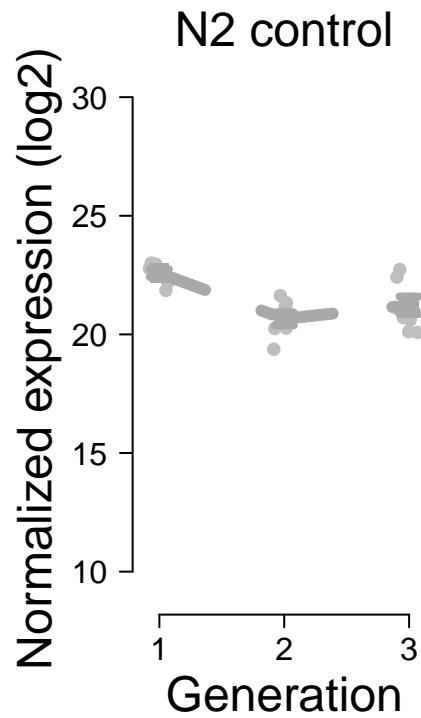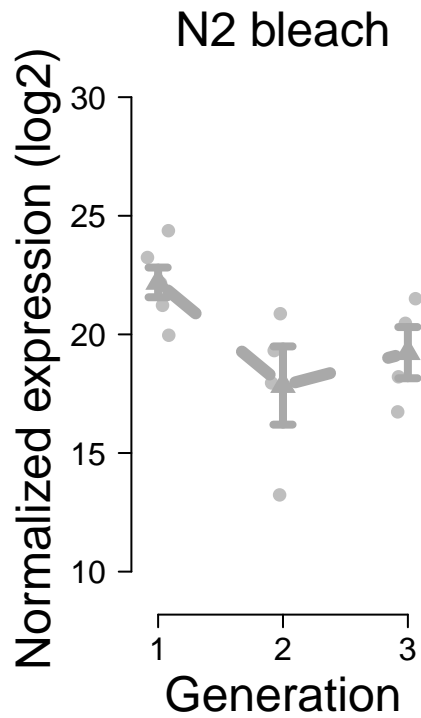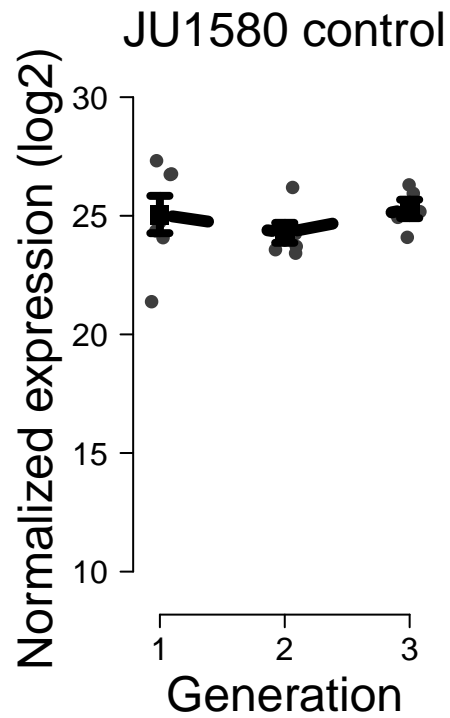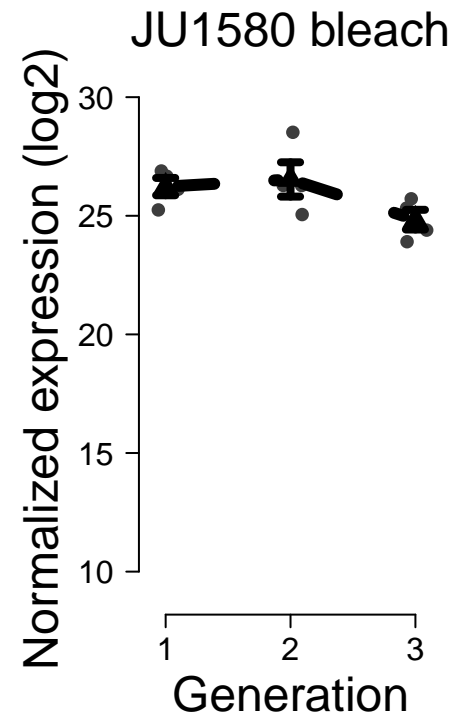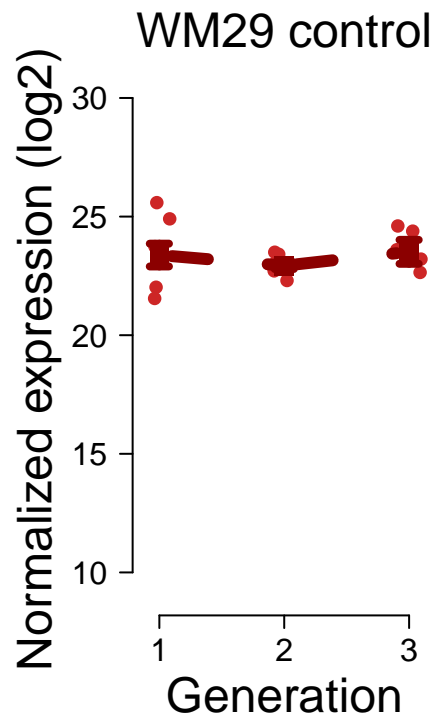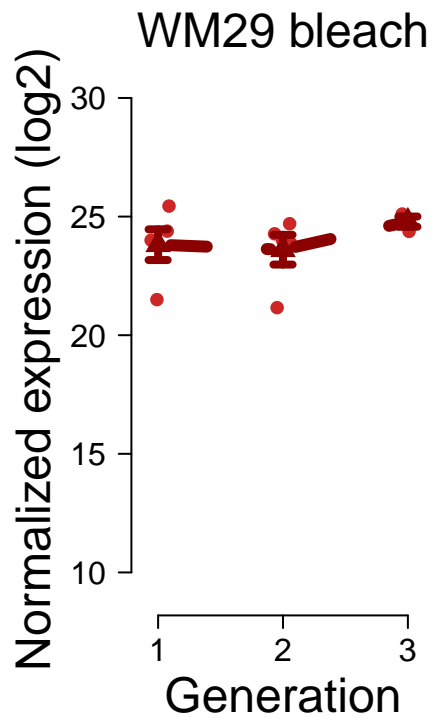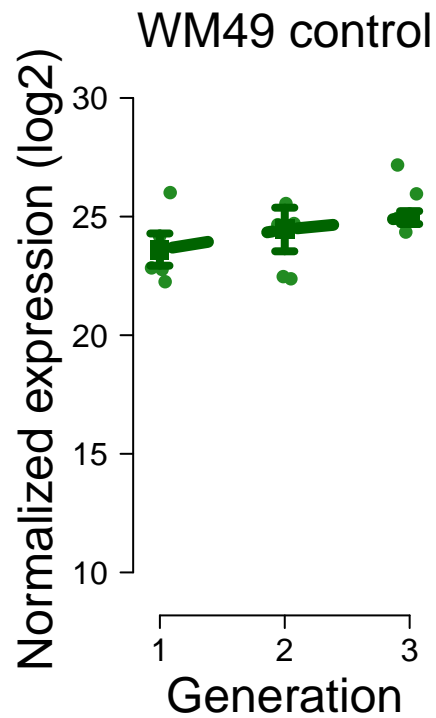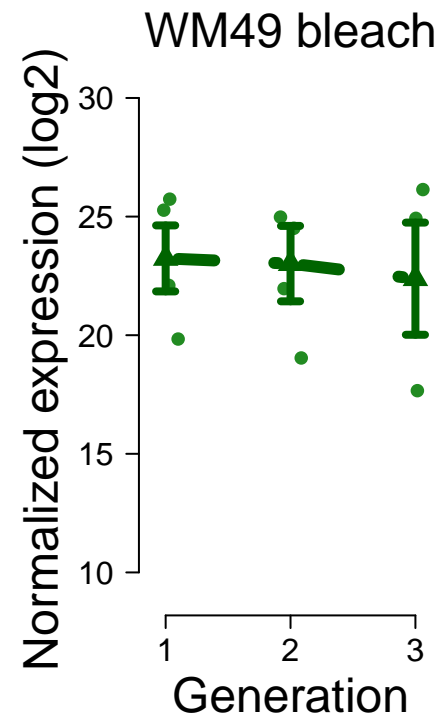

Supplement: pone.0089760.s002.pdf [file pone.0089760.s002.pdf]
