# Supplementary material for: A Heritable Antiviral RNAi Response Limits Orsay Virus Infection in Caenorhabditis elegans N2
Source: PubMed Central journal article supplement (PMC3933659; doi:10.1371/journal.pone.0089760), 2014-02-24
Supplement: pone.0089760.s003.pdf [file pone.0089760.s003.pdf]

| <b>Gene</b> | <b>strain</b> | <b>L1</b>   | <b>L2</b>   | <b>L3</b>   | <b>L4</b>   | <b>mixed</b> |
|-------------|---------------|-------------|-------------|-------------|-------------|--------------|
| Y37E3.7     | JU1580        | 22.6 (1.63) | 22.4 (1.51) | 21.6 (2.33) | 23.5 (2.21) | 21.4 (2)     |
|             | N2            | 22.2 (1.54) | 22 (1.24)   | 21.6 (2.24) | 24 (1.85)   | 21.4 (1.47)  |
|             | WM29          | NA          | NA          | 22.5 (1.09) | NA          | NA           |
|             | WM49          | NA          | NA          | 22.4 (0.82) | NA          | NA           |
| rpl-6       | JU1580        | 22.9 (2.03) | 21.4 (1.73) | 20.5 (2.81) | 22.3 (1.85) | 20.1 (1.84)  |
|             | N2            | 22 (1.93)   | 20.8 (1.27) | 20.3 (2.41) | 22.4 (1.79) | 20.6 (1.57)  |
|             | WM29          | NA          | NA          | 20.3 (1.14) | NA          | NA           |
|             | WM49          | NA          | NA          | 20.7 (0.81) | NA          | NA           |
